# Supplementary material for: A Bibliometric Analysis of 14,822 Researches on Myocardial Reperfusion Injury by Machine Learning
Source: MDPI journal article supplement (doi:10.3390/ijerph18158231), 2021-08-03
Supplement: s1 [file s1]

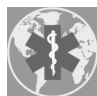

### Supplementary Material. Table S1-Related codes

```
from nltk.tokenize import RegexpTokenizer
from stop_words import get_stop_words
from nltk.stem.porter import PorterStemmer
from sklearn.utils import shuffle
from gensim import corpora, models
import pandas as pd
import logging
import pickle
import numpy as np
logging.basicConfig(level = logging.INFO,format = '%(asctime)s - %(name)s - %(levelname)s - %(message)s')
logger = logging.getLogger(__name__)

from gensim.models.ldamulticore import LdaMulticore

def dumppick(filename):
    corpus = []
    tokens = []
    df = pd.read_csv(filename,sep=',',encoding="utf8")
    df = df[df["abstract"].isna()!=True]
    #df = df[df.year<2019]

    for line in df["abstract"]:
        corpus.append(line.strip())
    del df

    stop_words = get_stop_words('english')
    en_stop = [ str(i).strip() for i in stop_words ]

    p_stemmer = PorterStemmer()

    print("wen ben yu chu li")
    tokenizer = RegexpTokenizer(r'[A-Za-z]+')
    for i,text in enumerate(corpus):
        if i%1000==0:
            print(i)
            raw = text.lower()
            token = tokenizer.tokenize(raw)
            stop_remove_token = [word for word in token if (word not in en_stop and len(word)>1)]
            stem_token = [p_stemmer.stem(word) for word in stop_remove_token]
            tokens.append(stop_remove_token)
    # print tokens

    print("start" )
    dictionary = corpora.Dictionary(tokens)
    # print dictionary.token2id
    # print type(dictionary)
    print("")
    texts = [dictionary.doc2bow(text) for text in tokens]
    print("accomplished")
```

```

# lda_model = models.Ldamodel.LdaModel(texts, num_topics=3, id2word=dictionary, passes=500)
# print lda_model.print_topics(num_topics=3,num_words=4)
# corpus_lda = lda_model[texts]
# for doc in corpus_lda:
#     print doc

print("开始 tfidf")
texts_tf_idf = models.TfidfModel(texts)[texts]
## for text in texts_tf_idf:
##     print text
# lda_tf_idf = models.LdaModel(texts_tf_idf, num_topics=3, id2word=dictionary, update_every=0, passes=200)
# print lda_tf_idf.print_topics(num_topics=3,num_words=4)
## doc_topic = [a for a in lda_tf_idf[texts_tf_idf]]
## for topic_id in range(3):
##     print "topic:{}".format(topic_id+1)
##     print lda_tf_idf.show_topic(topic_id)
# corpus_lda_tfidf = lda_tf_idf[texts_tf_idf]
# for doc in corpus_lda_tfidf:
#     print doc
pickle.dump(texts, open("text_dtm.pickle","wb"))
pickle.dump(texts_tf_idf, open("texts_tf_idf_dtm.pickle","wb"))
pickle.dump(dictionary, open("dictionary.pickle","wb"))

def loadpcik():
    texts = pickle.load(open("text_dtm.pickle","rb"))
    texts_tf_idf = pickle.load(open("texts_tf_idf_dtm.pickle","rb"))
    dictionary = pickle.load(open("dictionary.pickle","rb"))
    return texts, texts_tf_idf,dictionary

#dumppick()
def createlda(num_topics,filename):
    dumppick(filename)
    num_topics = 50
    texts, texts_tf_idf, dictionary = loadpcik()

    """
    print("*****LSI*****")
    lsi = models.Lsimodel.LsiModel(corpus=texts, id2word=dictionary, num_topics=20)
    texts_lsi = lsi[texts_tf_idf]
    print(lsi.print_topics(num_topics=20, num_words=10))
    """

    print("*****LDA*****")
    #ppl = []
    #for i in range(1,50,1):
    #    texts = shuffle(texts)

```

```

        #texts_train = texts[:int(24012*(0.9))]
        #texts_vad = texts[int(24012*(0.9)):]
    lda = LdaMulticore(corpus=texts,iterations=1000, id2word=dictionary, num_topics=num_top-
ics,passes=200,per_word_topics=True)
    #texts_lda = lda[texts_tf_idf]
    out = open("ldamd{0}tpc-tpc".format(num_topics),"w",encoding="utf8")
    print(lda.print_topics(num_topics=num_topics, num_words=10),file=out)
    lda.save("ldamd{0}tpc+{0}".format(num_topics,filename[9:18]))
    #ppl.append(np.exp2(-lda.log_perplexity(texts_vad))/i)
    return lda,texts, texts_tf_idf, dictionary

def lodaldaml():
    lda = models.LdaModel.load("ldamd50tpc-tpc")

def saveldatpcw(lda):
    tpcn = 50
    tpcw = pd.DataFrame(columns=[i for i in range(1,11)])
    for i in range(tpcn):
        tpcw.loc[i] = [ w for w,p in lda.show_topic(i)]
    tpcw.to_csv("newdatatpcw.csv")

def get_cite_n_dmt(dictionary,citenum=0,):
    citenum=0
    corpus = []
    tokens = []
    df = pd.read_csv("pubmed2csv.csv",sep=',',encoding="utf8")
    df = df[df["施引文献"]==citenum]
    df = df[df["abstract"].isna()!=True]

    for line in df["abstract"]:
        corpus.append(line.strip())
    del df

    stop_words = get_stop_words('english')
    en_stop = [ str(i).strip() for i in stop_words ]

    p_stemmer = PorterStemmer()

    print("wen ben yu chu li")
    tokenizer = RegexpTokenizer(r'[A-Za-z]+')
    for i,text in enumerate(corpus):
        if i%1000==0:
            print(i)
            raw = text.lower()
            token = tokenizer.tokenize(raw)
            stop_remove_token = [word for word in token if (word not in en_stop and len(word)>1)]
            stem_token = [p_stemmer.stem(word) for word in stop_remove_token]
            tokens.append(stop_remove_token)
    texts_cite_n = [dictionary.doc2bow(text) for text in tokens]
    return texts_cite_n

def get0cited2tpc(lda,texts):

```

```

tpc1 = []
tpc2 = []
for i in texts_cite_0:
    tpc = lda.get_document_topics(i)
    tpc = sorted(tpc, key=lambda x: -x[1])
    tpc1.append(tpc[0][0])
    if len(tpc) > 1:
        tpc2.append(tpc[1][0])
    else:
        tpc2.append(lda.num_topics + 1)
df = pd.read_csv("withoutNAabstract", sep=',', encoding="utf8")
df = df[df["reference"] == 0]
df = df[df["abstract"].isna() != True]
df["tpc1"] = tpc1
df["tpc2"] = tpc2
df.to_csv("0cite_tpc.csv")
return tpc1, tpc2

def getallcited2tpc(lda, texts, filename):
    tpc1 = []
    tpc2 = []
    for i in texts:
        tpc = lda.get_document_topics(i)
        tpc = sorted(tpc, key=lambda x: -x[1])
        tpc1.append(tpc[0][0])
        if len(tpc) > 1:
            tpc2.append(tpc[1][0])
        else:
            tpc2.append(lda.num_topics + 1)
    df = pd.read_csv(filename, sep=',', encoding="utf8")
    df = df[df["abstract"].isna() != True]
    #df = df[df.year < 2019]
    df["tpc1"] = tpc1
    df["tpc2"] = tpc2
    df.to_csv(filename)
    return tpc1, tpc2

def grap(tpc1, tpc2, tpcn, filename):
    from collections import Counter
    CC = Counter(tpc1)
    import networkx as nx
    G = nx.Graph()
    for i in range(tpcn):
        G.add_node(i, num=CC[i])
    #edgscount = Counter([(i, j) for i, j in zip(tpc1, tpc2)])
    #for edgs, count in edgscount.items()
    edgeslist = [(i, j) for i, j in zip(tpc1, tpc2) if j < tpcn]
    G.add_edges_from(edgeslist, Weight=0)
    for i, j in zip(tpc1, tpc2):
        if j >= tpcn:
            continue
        G.edges[i, j]["Weight"] += 1
    nx.write_graphml(G, filename.replace(".csv", ".graphml"), encoding="utf8")
    return G

```

```

def Grap_Add_tpcname():
    import pandas as pd
    c = pd.read_excel("newdatatpcw.xlsx")
    pic = {tpcid:name for tpcid,name in zip(range(50),c["meshtermnaming"])}
    import networkx as nx
    g = nx.read_graphml("withoutNAabstract.graphml")
    for i in range(50):
        g.node[str(i)]["name"] = pic[i]
    nx.write_graphml(g,"withoutNAabstract_addname.graphml",encoding="utf8")

def main():
    filename = "withoutNAabstract.csv"

    lda,texts, texts_tf_idf, dictionary = createlda(50,filename)

    saveldatpcw(lda)

    tpc1,tpc2 = getallcited2tpc(lda,texts,filename)

    grap(tpc1,tpc2,50,filename)

    Grap_Add_tpcname()

if __name__ == "__main__":
    main()

```

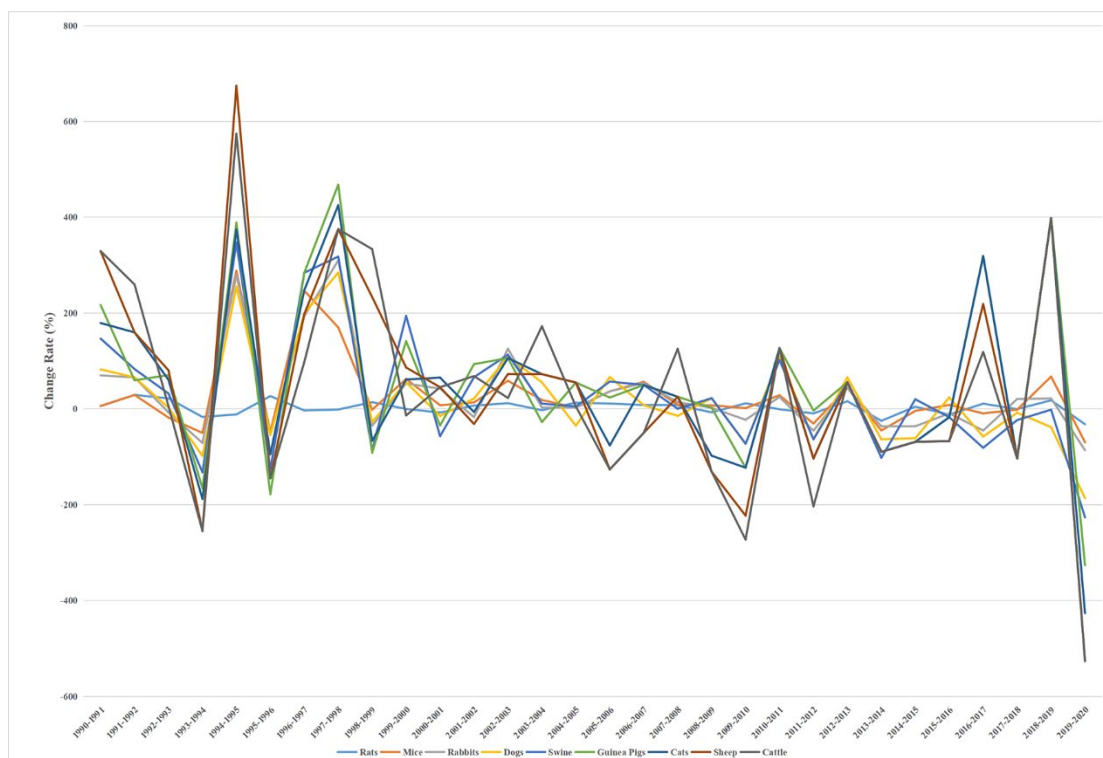

**Figure S1.** Change rate of the MeSH terms related to animal types.

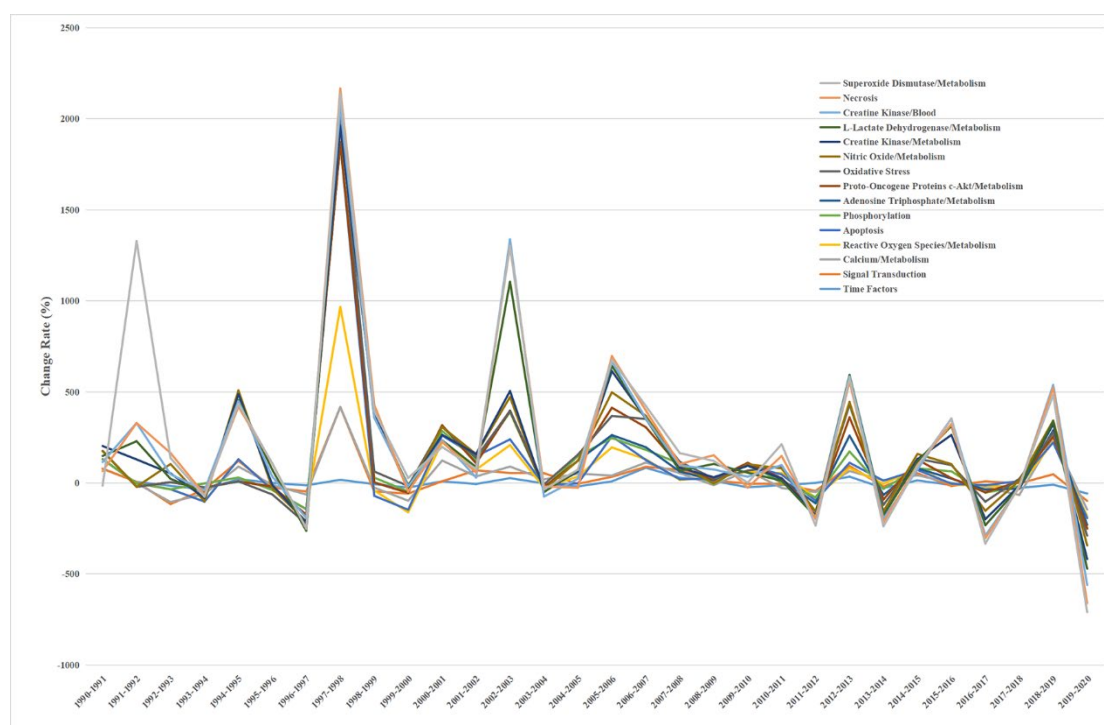

**Figure S2.** Change rate of the top 15 MeSH terms related to the pathogenesis of myocardial reperfusion injury.

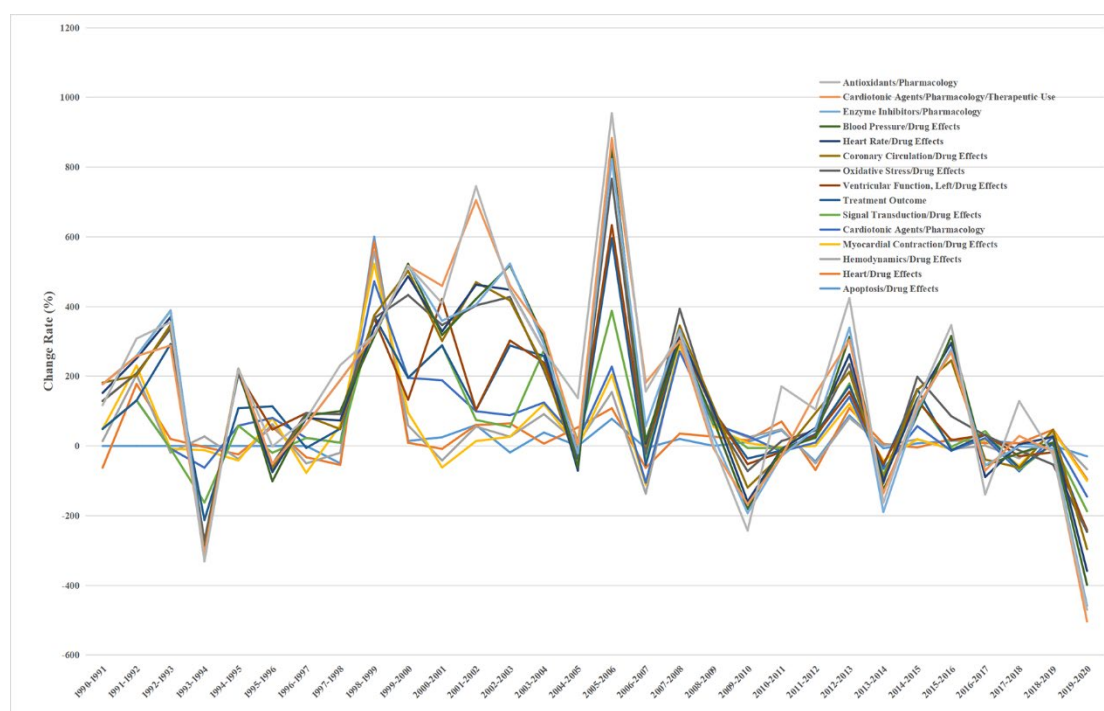

**Figure S3.** Change rate of the top 15 MeSH terms related to the treatment of myocardial reperfusion injury.
